# Supplementary material for: Spatiotemporal evolution of the global species diversity of Rhododendron
Source: Research Square preprint supplement (doi:10.21203/rs.3.rs-125967/v1), 2020-12-29
Supplement: Supplementary file 1 [file 81291c2b21d1b6d7000f956b.xlsx]

## Sheet: Information
Information of transcriptomes sequenced in this study
No.	Sampling No.	Genus	Subgenus	Section	Subsection	Species	No. of raw reads	No. of transcripts	N50 (bp)	No. of unigenes	No. of CDS
1	1_R_viriHXY03	Rhododendron	Rhododendron	Rhododendron	Trichoclada	R. viridescens_	23446265	186473	1135	100101	68114
2	2_R_virgHXY01	Rhododendron	Rhododendron	Rhododendron	Virgata	R. virgatum	24355489	192438	1149	104056	69376
3	3_R_hunnHXY02	Rhododendron	Hymenanthes	Ponticum	Argyrophylla	R. hunnewellianum	24437759	238737	1045	148618	92328
4	4_R_uvarHXY02	Rhododendron	Hymenanthes	Ponticum	Fulva	R. uvariifolium	27626073	198691	1100	114747	82923
5	5_R_granHXY02	Rhododendron	Hymenanthes	Ponticum	Grandia	R. grande	25165908	224408	997	124125	86025
6	6_R_glisHXY01	Rhododendron	Hymenanthes	Ponticum	Glischra	R. glischrum	25438943	262427	990	171984	111126
7	7_R_crinHXY01	Rhododendron	Hymenanthes	Ponticum	Glischra	R. crinigerum	30826985	209865	1108	118543	78532
8	8_R_mucrLS_01	Rhododendron	Tsutsusi	Tsutsusi		R. mucronatum	25820717	219558	1056	116655	76522
9	11_R_mariLS_02	Rhododendron	Tsutsusi	Brachycalyx		R. mariesii_	26614217	177666	1016	94074	67211
10	17_R_jmolLS01D	Rhododendron	Pentanthera	Pentanthera	Pentanthera	R. molle_	26072789	172772	1093	78644	62264
11	18_R_striLS_01	Rhododendron	Tsutsusi	Tsutsusi		R. strigosum	28592186	234084	1054	136048	90965
12	19_R_striLS_02	Rhododendron	Tsutsusi	Tsutsusi		R. strigosum_	26991378	169661	1147	69508	62586
13	20_R_liliLS_01	Rhododendron	Rhododendron	Rhododendron	Maddenia	R. liliiflorum	23799643	268446	1095	163980	102710
14	21_R_liliLS_02	Rhododendron	Rhododendron	Rhododendron	Maddenia	R. liliiflorum_	24409198	217688	1322	82266	59460
15	22_R_kianLS_01	Rhododendron	Rhododendron	Rhododendron	Maddenia	R. kiangsiense_	29850141	182629	1321	93465	66883
16	23_R_kianLS_02	Rhododendron	Rhododendron	Rhododendron	Maddenia	R. kiangsiense	26099863	191784	1314	97339	67573
17	25_R_chamLS01D	Rhododendron	Azaleastrum	Choniastrum		R. championiae_	24176900	803406	418	658963	496264
18	26_R_oligHXY01	Rhododendron	Hymenanthes	Ponticum	Maculifera	R. oligocarpum	29618029	374363	913	250496	150264
19	30_R_faucHXY01	Rhododendron	Hymenanthes	Ponticum	Thomsonia	R. faucium	22893369	259228	1001	164280	103804
20	31_R_compHXY01	Rhododendron	Rhododendron	Rhododendron	Lapponica	R. complexum	23557122	433604	797	298124	201954
21	37_R_platHXY01	Rhododendron	Hymenanthes	Ponticum	Fortunea	R. platypodum	27233964	219616	1119	123543	80216
22	38_R_vellHXY01	Rhododendron	Hymenanthes	Ponticum	Taliensia	R. vellereum	36574861	343064	905	217541	133320
23	40_R_lepiHXY02	Rhododendron	Rhododendron	Rhododendron	Lepidota	R. lepidotum	24898279	187559	1268	111914	75077
24	41_R_arizHXY01	Rhododendron	Hymenanthes	Ponticum	Falconera	R. arizelum	20573228	231727	978	162005	111283
25	44_R_rex_HXY01	Rhododendron	Hymenanthes	Ponticum	Falconera	R. rex	22521172	271298	1019	170854	117475
26	46_R_polyHXY02	Rhododendron	Rhododendron	Rhododendron	Triflora	R. polylepis	26507654	252632	1185	146887	101812
27	51_R_auguHXY01	Rhododendron	Rhododendron	Rhododendron	Triflora	R. augustinii	22457356	256408	834	165467	107470
28	55_R_kwanHXY01	Rhododendron	Hymenanthes	Ponticum	Fortunea	R. kwangfuense	25148680	199106	1033	125131	81683
29	57_R_maoeHXY01	Rhododendron	Hymenanthes	Ponticum	Fortunea	R. maoerense	22178137	190866	1177	107499	72816
30	66_R_macuHXY02	Rhododendron	Hymenanthes	Ponticum	Maculifera	R. maculiferum	26458489	191741	1055	125686	83498
31	69_R_semnHXY01	Rhododendron	Hymenanthes	Ponticum	Falconera	R. semnoides	26588827	208118	956	144586	88548
32	71_R_lanaHXY01	Rhododendron	Hymenanthes	Ponticum	Lanata	R. lanatum	22238192	165709	1226	101861	64748
33	76_R_sideHXY01	Rhododendron	Hymenanthes	Ponticum	Grandia	R. sidereum	25053044	185506	1167	100830	67534
34	78_R_pendHXY01	Rhododendron	Rhododendron	Rhododendron	Edgeworthia	R. pendulum	28020516	242648	1234	133128	86137
35	81_R_thomHXY02	Rhododendron	Hymenanthes	Ponticum	Thomsonia	R. thomsonii	20076439	208103	1146	109220	73044
36	83_R_kongHXY02	Rhododendron	Rhododendron	Pogonanthum	Pogonanthum	R. kongboense	27037218	212811	1195	114927	77788
37	87_R_kyawHXY02	Rhododendron	Hymenanthes	Ponticum	Parishia	R. kyawii	22009320	215613	1125	112753	76144
38	99_R_scabHXY02	Rhododendron	Rhododendron	Rhododendron	Scabrifolia	R. scabrifolium	22566433	186566	1068	114460	77857
39	103_R_spinHXY02	Rhododendron	Rhododendron	Rhododendron	Scabrifolia	R. spinuliferum_	19907910	138055	1162	78198	60983
40	108_R_fulvHXY01	Rhododendron	Hymenanthes	Ponticum	Fulva	R. fulvum	24055477	206259	1183	126645	85138
41	114_R_sutcHXY01	Rhododendron	Hymenanthes	Ponticum	Fortunea	R. sutchuenense_	22225736	158806	1098	85989	63216
42	115_R_sutcHXY02	Rhododendron	Hymenanthes	Ponticum	Fortunea	R. sutchuenense	20371258	177494	1098	92512	65231
43	116_R_bainHXY01	Rhododendron	Hymenanthes	Ponticum	Selensia	R. bainbridgeanum_	26164190	175718	1218	92554	66890
44	117_R_bainHXY02	Rhododendron	Hymenanthes	Ponticum	Selensia	R. bainbridgeanum	22535680	184462	1145	94356	67045
45	118_R_seleHXY01	Rhododendron	Hymenanthes	Ponticum	Selensia	R. selense	21459697	187323	1128	101599	70856
46	119_R_mekoHXY02	Rhododendron	Rhododendron	Rhododendron	Trichoclada	R. mekongense	27065327	309079	1050	179035	111984
47	121_R_saluHXY01	Rhododendron	Rhododendron	Rhododendron	Saluenensia	R. saluenense	24998720	236398	1086	126787	80160
48	122_R_saluHXY02	Rhododendron	Rhododendron	Rhododendron	Saluenensia	R. saluenense_	23473429	208786	1145	115067	76572
49	123_R_watsHXY01	Rhododendron	Hymenanthes	Ponticum	Grandia	R. watsonii_	23039744	197946	1062	110257	71978
50	128_R_hodgHXY__	Rhododendron	Hymenanthes	Ponticum	Falconera	R. hodgsonii	22826225	156517	1067	85125	63703
51	129_R_tsarHXY01	Rhododendron	Hymenanthes	Ponticum	Lanata	R. tsariense	26458773	236978	1029	135951	87240
52	130_R_tsarHXY02	Rhododendron	Hymenanthes	Ponticum	Lanata	R. tsariense_	20404532	203408	1067	117138	80265
53	131_R_coelHXY01	Rhododendron	Hymenanthes	Ponticum	Taliensia	R. coeloneurum_	22201488	221709	1026	123413	81643
54	132_R_coelHXY02	Rhododendron	Hymenanthes	Ponticum	Taliensia	R. coeloneurum	23425242	265448	900	150993	101601
55	133_R_faitHXY01	Rhododendron	Hymenanthes	Ponticum	Fortunea	R. faithiae	22893203	226122	1024	114367	75320
56	134_R_faitHXY02	Rhododendron	Hymenanthes	Ponticum	Fortunea	R. faithiae_	22669999	237663	1011	109383	74390
57	135_R_stamHXY02	Rhododendron	Azaleastrum	Choniastrum	Choniastrum	R. stamineum	22593815	243207	953	118761	81633
58	142_R_sinoY36_4	Rhododendron	Hymenanthes	Ponticum	Grandia	R. sinogrande	20008462	245605	1160	120151	75286
59	148_R_coriY31_2	Rhododendron	Hymenanthes	Ponticum	Falconera	R. coriaceum	24190773	271190	935	176959	120667
60	149_R_coriY31_3	Rhododendron	Hymenanthes	Ponticum	Falconera	R. coriaceum_	19647525	208675	998	116108	74988
61	156_R_decoY47_1	Rhododendron	Hymenanthes	Ponticum	Fortunea	R. decorum	18671631	200353	1121	99418	67731
62	157_R_decoY47_2	Rhododendron	Hymenanthes	Ponticum	Fortunea	R. decorum_	23621759	162321	1271
63	158_R_hippY57_1	Rhododendron	Rhododendron	Rhododendron	Lapponica	R. hippophaeoides_	21061929	182400	1240
64	162_R_hippY57_2	Rhododendron	Rhododendron	Rhododendron	Lapponica	R. hippophaeoides	23059722	188618	1234	96720	67810
65	166_R_beesXZPE4	Rhododendron	Hymenanthes	Ponticum	Taliensia	R. beesianum	24091279	182315	720	94673	81621
66	167_R_lepiXZPE5	Rhododendron	Rhododendron	Rhododendron	Lepidota	R. lepidotum_	23018389	128932	1090	75151	60199
67	168_R_anthXZPE6	Rhododendron	Rhododendron	Pogonanthum	Pogonanthum	R. anthopogon	21596246	161065	1008	80748	57735
68	169_R_arboXZPE7	Rhododendron	Hymenanthes	Ponticum	Arborea	R. arboreum_	25473860	116704	1087	62189	50269
69	172_R_caloEM1_1	Rhododendron	Hymenanthes	Ponticum	Fortunea	R. calophytum_	23073865	256801	941	163757	108029
70	173_R_caloEM1_4	Rhododendron	Hymenanthes	Ponticum	Fortunea	R. calophytum	24786732	264559	993	166109	106523
71	174_R_pingEM2_1	Rhododendron	Hymenanthes	Ponticum	Argyrophylla	R. pingianum	24505291	191263	1133	103373	73959
72	175_R_pachEM4_2	Rhododendron	Hymenanthes	Ponticum	Maculifera	R. pachytrichum_	23002105	178209	1140	98549	66539
73	178_R_oreoEM6_1	Rhododendron	Hymenanthes	Ponticum	Fortunea	R. oreodoxa_	26491113	198258	1243	104672	71693
74	179_R_oreoEM6_3	Rhododendron	Hymenanthes	Ponticum	Fortunea	R. oreodoxa	21747912	219559	1203	118826	81064
75	180_R_fabeEM7_1	Rhododendron	Hymenanthes	Ponticum	Taliensia	R. faberi	20641838	233568	1154	146716	98062
76	181_R_fabeEM7_2	Rhododendron	Hymenanthes	Ponticum	Taliensia	R. faberi_	26530057	208582	1280	118432	82582
77	182_R_nitVEM8_1	Rhododendron	Rhododendron	Rhododendron	Lapponica	R. nitidulum_	21039210	307360	801	116298	83726
78	184_R_nivaXZ-03	Rhododendron	Rhododendron	Rhododendron	Lapponica	R. nivale	20729135	226396	1232	111936	71290
79	185_R_fragXZ-03	Rhododendron	Rhododendron	Rhododendron	Fragariflora	R. fragariiflorum_	24250473	243883	1258	121375	74213
80	186_R_fragXZ-04	Rhododendron	Rhododendron	Rhododendron	Fragariflora	R. fragariiflorum	24943427	236506	1292	117730	70578
81	189_R_lulaXZ-01	Rhododendron	Hymenanthes	Ponticum	Taliensia	R. lulangense_	23041240	232693	1224	124590	76678
82	190_R_lulaXZ_02	Rhododendron	Hymenanthes	Ponticum	Taliensia	R. lulangense	25740932	260311	1187	139578	85287
83	197_R_spicKZ_04	Rhododendron	Rhododendron	Rhododendron	Scabrifolia	R. spiciferum	21187535	291625	1005	165613	102692
84	198_R_lukiKZ_05	Rhododendron	Hymenanthes	Ponticum	Irrorata	R. lukiangense	20558272	264663	914	158463	98850
85	199_R_hemsKZ_10	Rhododendron	Hymenanthes	Ponticum	Fortunea	R. hemsleyanum	15463429	219940	800	139145	88628
86	207_R_trifXZ_01	Rhododendron	Rhododendron	Rhododendron	Triflora	R. triflorum	20114959	249740	1215	132998	82176
87	208_R_trifXZ_02	Rhododendron	Rhododendron	Rhododendron	Triflora	R. triflorum_	23282015	220799	1273	111422	68618
88	212_R_spinKZ_02	Rhododendron	Rhododendron	Rhododendron	Scabrifolia	R. spinuliferum	28452769	425467	887	278934	168106
89	213_R_exceKZ6_1	Rhododendron	Rhododendron	Rhododendron	Maddenia	R. excellens	20637621	216177	1103	117432	77253
90	214_R_exceKZ6_2	Rhododendron	Rhododendron	Rhododendron	Maddenia	R. excellens_	21097090	205252	1145	105346	69711
91	216_R_roseKZ_19	Rhododendron	Rhododendron	Rhododendron	Maddenia	R. roseatum	22626741	227909	975	125858	82210
92	217_R_proVKZ_21	Rhododendron	Hymenanthes	Ponticum	Grandia	R. protistum_	20535528	225390	1002	125042	79755
93	218_R_ciliKZ_23	Rhododendron	Rhododendron	Rhododendron	Maddenia	R. ciliicalyx	20135485	276808	852	180621	123397
94	219_R_ciliKZ23_	Rhododendron	Rhododendron	Rhododendron	Maddenia	R. ciliicalyx_	20934713	251769	878	158431	108161
95	221_R_annaKZ_36	Rhododendron	Hymenanthes	Ponticum	Irrorata	R. annae	23342123	269135	957	150715	95490
96	222_R_rhomKZ_37	Rhododendron	Rhododendron	Rhododendron	Maddenia	R. rhombifolium	23006776	210832	1090	114201	79550
97	223_R_fuyuKZ_44	Rhododendron	Rhododendron	Rhododendron	Scabrifolia	R. fuyuanense	23167724	267113	1003	160522	101983
98	225_R_pulcLS058	Rhododendron	Tsutsusi	Tsutsusi		R. pulchrum	19271961	160418	798	105990	84544
99	226_R_pulcLS059	Rhododendron	Tsutsusi	Tsutsusi		R. pulchrum	27099193	349825	535	266130	203823
100	227_R_arboLS061	Rhododendron	Pentanthera	Pentanthera		R. arborescens	22288831	134865	710	86940	64370
101	232_R_ciliLS098	Rhododendron	Rhododendron	Rhododendron	Maddenia	R. ciliatum	25017834	231819	602	167893	101365
102	236_R_periLS118	Rhododendron	Pentanthera	Pentanthera		R. periclymenoides_	30176175	183064	1000	104741	71700
103	240_R_sikaLS123	Rhododendron	Hymenanthes	Ponticum	Maculifera	R. sikangense	24401304	179845	817	88817	65581
104	241_R_nivaXSLZ2	Rhododendron	Rhododendron	Rhododendron	Lapponica	R. nivale_	21332848	180369	1111	90728	68180
105	243_R_parvLS135	Rhododendron	Rhododendron	Rhododendron	Lapponica	R. parvifolium	22926597	140141	875	72660	57199
106	249_R_denuLS026	Rhododendron	Hymenanthes	Ponticum	Argyrophylla	R. denudatum	21404036	218517	1027	106154	80267
107	258_R_brevLS028	Rhododendron	Hymenanthes	Ponticum	Irrorata	R. brevinerve	22379988	231724	1163	118158	76600
108	259_R_haofLS031	Rhododendron	Hymenanthes	Ponticum	Argyrophylla	R. haofui	26654838	269142	1156	127894	84915
109	261_R_oldhLS067	Rhododendron	Tsutsusi	Tsutsusi		R. oldhamii	21382136	252717	1109	109112	72803
110	262_R_molSLS073	Rhododendron	Pentanthera	Pentanthera		R. molle	19163397	173339	1316	86613	63554
111	265_R_yakuLS076	Rhododendron	Hymenanthes	Ponticum	Pontica	R. yakushimanum_	21883509	175029	1335	91589	69793
112	269_R_chamLS035	Rhododendron	Azaleastrum	Choniastrum		R. championiae	22991952	370529	793	263858	176572
113	270_R_moulLS037	Rhododendron	Azaleastrum	Choniastrum		R. moulmainense	21923068	267650	860	152659	98958
114	271_R_bachLS047	Rhododendron	Azaleastrum	Azaleastrum		R. bachii	19628744	208277	979	113840	76075
115	272_R_yakuLS077	Rhododendron	Hymenanthes	Ponticum	Pontica	R. yakushimanum	22533038	191761	1209	100618	76021
116	274_R_farrLS87_	Rhododendron	Tsutsusi	Brachycalyx		R. farrerae	23959529	228592	1270	123035	78306
117	276_R_rhuyLS090	Rhododendron	Tsutsusi	Tsutsusi		R. rhuyuenense	18840275	233475	1117	135831	98134
118	282_R_adenLS115	Rhododendron	Hymenanthes	Ponticum	Argyrophylla	R. adenopodum	28981984	293844	1469	146554	106109
119	284_R_austLS121	Rhododendron	Pentanthera	Pentanthera		R. austrinum	25267375	195518	1360	97293	64778
120	285_R_schlLS126	Rhododendron	Pentanthera	Sciadorhodion		R. schlippenbachii	40255572	270799	1180	178143	108906
121	286_R_micrIBCA1	Rhododendron	Rhododendron	Rhododendron	Micrantha	R. micranthum	21616845	180214	1373	95611	65570
122	288_R_mucrIBCA1	Rhododendron	Rhododendron	Rhododendron	Rhododorastra	R. mucronulatum	28453982	186407	1339	110114	75632
123	292_R_neriHXY02	Rhododendron	Hymenanthes	Ponticum	Neriiflora	R. neriiflorum	22446566	213505	1272	118237	74829
124	294_R_sperHXY01	Rhododendron	Hymenanthes	Ponticum	Neriiflora	R. sperabile	34985426	282952	1249	142053	81327
125	298_R_hainGX_01	Rhododendron	Tsutsusi	Tsutsusi		R. hainanense	22924372	266981	1202	157394	94743
126	299_R_kwanCS_02	Rhododendron	Tsutsusi	Tsutsusi		R. kwangsiense	28004930	340113	1147	197538	132937
127	300_R_yangCS_01	Rhododendron	Tsutsusi	Tsutsusi		R. yangmingshanense	25190381	313226	1060	205839	127746
128	301_R_henrCS_01	Rhododendron	Azaleastrum	Choniastrum		R. henryi	23626303	182364	1190	104159	70162
129	302_R_florCS_01	Rhododendron	Tsutsusi	Tsutsusi		R. florulentum	26397341	221525	1214	122452	77134
130	306_R_fortKZ_22	Rhododendron	Hymenanthes	Ponticum	Fortunea	R. fortunei	20916980	202079	1278	104643	67694
131	309_R_stenKZ_26	Rhododendron	Azaleastrum	Choniastrum		R. stenaulum	20051908	236223	1049	145696	89252
132	311_R_longHXY01	Rhododendron	Rhododendron	Rhododendron	Tephropepla	R. longistylum	25178450	253603	1235	141678	81465
133	313_R_tephHXY01	Rhododendron	Rhododendron	Rhododendron	Tephropepla	R. tephropeplum	21864523	162849	1291	92735	62617
134	315_R_chaSHXY02	Rhododendron	Rhododendron	Rhododendron	Glauca	R. charitopes	20753408	257804	1103	168614	108537
135	316_R_barbHXY01	Rhododendron	Hymenanthes	Ponticum	Barbata	R. barbatum	19829874	221888	1258	125406	78124
136	317_R_viscHN_01	Rhododendron	Tsutsusi	Tsutsusi		R. viscidum_	24943112	206196	715	142444	96618
137	318_R_lappCBS04	Rhododendron	Rhododendron	Rhododendron	Lapponica	R. lapponicum	22271822	178288	1260	97409	70903
138	319_R_lappCBS09	Rhododendron	Rhododendron	Rhododendron	Lapponica	R. lapponicum_	17907323	175403	1185	93089	62329
139	321_R_aureCBS08	Rhododendron	Hymenanthes	Ponticum	Pontica	R. aureum	21087339	183089	1205	97814	63752
140	322_R_paluCBS02	Rhododendron	Rhododendron	Rhododendron	Ledum	R. tomentosum	22611513	189873	1069	113591	74831
141	329_R_cyanHXY01	Rhododendron	Hymenanthes	Ponticum	Thomsonia	R. cyanocarpum	25540794	224496	1039	138357	90945
142	330_R_watsHXY02	Rhododendron	Hymenanthes	Ponticum	Grandia	R. watsonii	20569034	210898	1186	110389	74035
143	331_R_setiHXY01	Rhododendron	Hymenanthes	Ponticum	Selensia	R. setiferum	21422938	233320	1185	123777	80067
144	334_R_soulHXY01	Rhododendron	Hymenanthes	Ponticum	Campylocarpa	R. souliei	24178714	243748	1202	124823	76037
145	343_R_tricHXY01	Rhododendron	Rhododendron	Rhododendron	Trichoclada	R. trichocladum	22143517	200022	1265	111296	74496
146	344_R_searHXY01	Rhododendron	Rhododendron	Rhododendron	Triflora	R. searsiae	16529665	188553	1294	98647	65783
147	345_R_jingHXY01	Rhododendron	Hymenanthes	Ponticum	Fortunea	R. jingangshanicum	19804367	252234	1164	135342	83044
148	346_R_guilHXY01	Rhododendron	Tsutsusi	Tsutsusi		R. pulchroides	22741060	194965	1268	106067	70899
149	348_R_ovatZJ_05	Rhododendron	Azaleastrum	Azaleastrum		R. ovatum	22481397	204845	1244	119958	79222
150	349_R_simiZJ_05	Rhododendron	Hymenanthes	Ponticum	Argyrophylla	R. simiarum	26125954	222456	1281	116655	72944
151	350_R_mariZJ_05	Rhododendron	Tsutsusi	Brachycalyx		R. mariesii	22118624	242502	1199	134173	87254
152	351_R_simsZJ_05	Rhododendron	Tsutsusi	Tsutsusi		R. simsii	23690320	239259	1202	130321	82501
153	352_R_latoZJ_05	Rhododendron	Azaleastrum	Choniastrum		R. latoucheae	19633674	204516	1231	105740	76497
154	354_R_nyinXZ_02	Rhododendron	Rhododendron	Pogonanthum	Pogonanthum	R. nyingchiense	24739246	225339	1284	116733	76553
155	359_R_vialLS094	Rhododendron	Azaleastrum	Azaleastrum		R. vialii	24263189	189899	1166	99513	66736
156	360_R_subfLS103	Rhododendron	Tsutsusi	Tsutsusi		R. subflumineum	22881848	213699	1234	112355	76000
157	361_R_obtuLS140	Rhododendron	Tsutsusi	Tsutsusi		R. obtusum	24889835	218961	1215	110605	74151
158	362_R_pachEM4_1	Rhododendron	Hymenanthes	Ponticum	Maculifera	R. pachytrichum	22861652	197008	1197	104363	67449
159	363_R_nitVEM8_2	Rhododendron	Rhododendron	Rhododendron	Lapponica	R. nitidulum	23408243	215820	1161	117468	75778
160	364_R_striEM11_	Rhododendron	Hymenanthes	Ponticum	Maculifera	R. strigillosum	22035396	260318	1050	161313	101210
161	366_R_hancKZ_42	Rhododendron	Azaleastrum	Choniastrum		R. hancockii	21026890	193175	1188	109213	73132
162	367_R_proVKZ_16	Rhododendron	Hymenanthes	Ponticum	Grandia	R. protistum	21723958	227275	1174	123772	80115
163	368_R_araiKZ_18	Rhododendron	Hymenanthes	Ponticum	Irrorata	R. araiophyllum	20897474	215326	1132	121764	80970
164	369_R_rivuGX_01	Rhododendron	Tsutsusi	Tsutsusi		R. rivulare	19767385	226987	1090	135792	89591
165	371_R_yuenYN_01	Rhododendron	Rhododendron	Vireya	Vireya	R. chevalieri	18289754	215118	1222	103716	69064
166	375_R_sessIN220	Rhododendron	Rhododendron	Vireya	Vireya	R. sessilifolium	20349209	162394	1309	85943	63925
167	379_R_malaIN289	Rhododendron	Rhododendron	Vireya	Malayovireya	R. malayanum	18495705	233448	927	137434	109101
168	381_R_citrI283_	Rhododendron	Rhododendron	Vireya	Vireya	R. citrinum	25037682	188809	1137	97455	72218
169	382_R_rariIN211	Rhododendron	Rhododendron	Vireya	Vireya	R. rarilepidotum	19925023	157882	1085	90806	68494
170	383_R_javaIN218	Rhododendron	Rhododendron	Vireya	Vireya	R. javanicum	20475241	179426	1095	105487	73492
171	385_R_lampIN286	Rhododendron	Rhododendron	Vireya	Albovireya	R. lampongum	18668792	147386	1167	82317	63455
172	387_R_mitrGX_40	Rhododendron	Azaleastrum	Azaleastrum		R. mitriforme	23505896	208171	1191	122912	78476
173	389_R_huanCS_55	Rhododendron	Tsutsusi	Tsutsusi		R. hunanense	25011165	208276	1209	119698	76685
174	391_R_tats156_1	Rhododendron	Rhododendron	Rhododendron	Triflora	R. tatsienense	21353865	157148	1255	92320	66896
175	392_R_pron157_1	Rhododendron	Hymenanthes	Ponticum	Taliensia	R. pronum	19423927	232240	1050	147393	98362
176	395_R_lute58_2	Rhododendron	Rhododendron	Rhododendron	Triflora	R. lutescens	18976725	181133	1328	97475	69150
177	396_R_thym71_1	Rhododendron	Rhododendron	Rhododendron	Lapponica	R. thymifolium	20269166	174189	1345	97405	69269
178	398_R_micrYN___	Rhododendron	Tsutsusi	Tsutsusi		R. microphyton	28842974	333308	541	247172	148387
179	399_R_emarYN___	Rhododendron	Rhododendron	Vireya	Pseudovireya	R. emarginatum	24659443	167190	1069	93940	62612
180	400_R_tutcYN___	Rhododendron	Azaleastrum	Choniastrum		R. tutcherae	26835103	466637	408	357829	206981
181	401_R_flumYN___	Rhododendron	Tsutsusi	Tsutsusi		R. flumineum	21770199	266527	724	179733	106112
182	407_R_viriHX6_1	Rhododendron	Rhododendron	Rhododendron	Trichoclada	R. viridescens	27157648	181326	1342	99816	70807
183	411_R_ririH48_1	Rhododendron	Hymenanthes	Ponticum	Argyrophylla	R. ririei	25466960	229010	1304	121292	76717
184	414_R_wiltE16_2	Rhododendron	Hymenanthes	Ponticum	Taliensia	R. wiltonii	21504561	250021	1210	154772	100006
185	415_R_prinH_104	Rhododendron	Hymenanthes	Ponticum	Taliensia	R. principis	19094199	195609	1261	103731	68443
186	428_R_bloeIN288	Rhododendron	Rhododendron	Vireya	Vireya	R. bloembergenii	13658076	143169	1345	82305	61766
187	HR01_Rarbo_Yi	Rhododendron	Hymenanthes	Ponticum	Arborea	R. arboreum	32221223	87608	1350	58003	41800
188	HR02_Rchan_Ji	Rhododendron	Rhododendron	Rhododendron	Maddenia	R. changii	32594957	106213	1431	72371	48775
189	HR04_RochR_Ji	Rhododendron	Hymenanthes	Ponticum	Maculifera	R. ochraceum	32543195	134699	1416	88720	57485
190	HR05_Rarbo_Mi	Rhododendron	Pentanthera	Pentanthera	Pentanthera	R. arborescens_	32070694	62260	1196	43080	35415
191	HR06_Ratla_Mi	Rhododendron	Pentanthera	Pentanthera	Pentanthera	R. atlanticum	32656826	83348	1160	55793	44109
192	HR07_Rcane_Mi	Rhododendron	Pentanthera	Pentanthera	Pentanthera	R. canescens	32270074	76691	1450	49298	39003
193	HR08_Rperi_Mi	Rhododendron	Pentanthera	Pentanthera	Pentanthera	R. periclymenoides	33099240	64970	1436	44063	35200
194	HR09_Rprin_Mi	Rhododendron	Pentanthera	Pentanthera	Pentanthera	R. prinophyllum	32441435	58705	1536	37140	34346
195	HR10_Rlute_Mi	Rhododendron	Pentanthera	Pentanthera	Pentanthera	R. luteum	32351177	74699	1257	51228	40916
196	HR11_Rvisc_Mi	Rhododendron	Pentanthera	Pentanthera	Pentanthera	R. viscosum	33168850	58082	1106	41299	34856
197	HR12_Rmaxi_Mi	Rhododendron	Hymenanthes	Ponticum	Pontica	R. maximum	32365001	144050	1137	98816	62599
198	HR13_RsmiR_Mi	Rhododendron	Hymenanthes	Ponticum	Pontica	R. smirnowii	33128167	143381	1214	81605	49731
199	HR16_Rloch_Me	Rhododendron	Rhododendron	Vireya	Vireya	R. lochiae	32060462	75832	1274	47606	36772
200	HR18_Rbrac_Ja	Rhododendron	Hymenanthes	Ponticum	Pontica	R. brachycarpum	7538172	19912	732	16207	14357
201	HR19_Rgoyo_Ja	Menziesia				R. goyozanense	18577176	35860	1069	26644	24599
202	HR20_Rjapo_Ja	Rhododendron	Hymenanthes	Ponticum	Pontica	R. japonoheptamerum	10240038	35050	629	28029	21704
203	HR21_Rkomi_Ja	Rhododendron	Tsutsusi	Tsutsusi		R. komiyamae	22695884	54856	853	40043	29974
204	HR22_Rmaki_Ja	Rhododendron	Hymenanthes	Ponticum	Pontica	R. makinoi	13387015	33798	832	23566	19194
205	HR25_Rripe_Ja	Rhododendron	Tsutsusi	Tsutsusi		R. ripense	17552769	68512	654	52470	38794
206	HR30_yakum_Ja	Rhododendron	Tsutsusi	Brachycalyx		R. yakumontanum	19682486	43709	1116	30067	27696
207	HR33_EnigrCBS	Empetrum				Empetrum nigrum	47782020	79355	1486	51360	38584
208	HR34_Rleis_GZ	Rhododendron	Hymenanthes	Ponticum	Williamsiana	R. leishanicum	37505198	136948	1131	99734	68417
209	HR35_RerosHXY	Rhododendron	Hymenanthes	Ponticum	Barbata	R. erosum	40716066	81858	1432	53300	42231
210	HR37_Rbenh_Ja	Menziesia				R. benhallii	32867636	140793	584	116235	88362
211	HR38_Rcamt_Ja	Rhododendron	Therorhodion			R. camtschaticum	33830888	72675	1274	46646	37179
212	HR39_RdauR_Ja	Rhododendron	Rhododendron	Rhododendron	Rhododorastra	R. dauricum	34760022	71363	979	48299	36964
213	HR40_Rdila_Ja	Rhododendron	Tsutsusi	Brachycalyx		R. dilatatum	31069900	54088	1209	35839	29139
214	HR41_RdegR_Ja	Rhododendron	Hymenanthes	Ponticum	Pontica	R. degronianum	23354327	58035	790	36516	27423
215	HR42_Rhypo_Ja	Ledum				R. hypoleucum	38378257	66951	1073	44812	35409
216	HR43_Rmult_Ja	Menziesia				R. multiflorum	32961916	67067	1110	42644	35592
217	HR44_Rpent_Ja	Menziesia				R. pentandrum	23964727	80201	830	63014	48058
218	HR45_Rvisc_Ja	Rhododendron	Tsutsusi	Brachycalyx		R. viscistylum	30992509	60842	1016	43070	34317
219	HR46_yakui_Ja	Rhododendron	Tsutsusi	Tsutsusi		R. yakuinsulare	21721507	46190	868	31658	26491
220	HR47_RferR_EU	Rhododendron	Rhododendron	Rhododendron	Rhododendron	R. ferrugineum	44922635	69490	1472	46859	36453
221	HR49_Ralbi_Ca	Rhododendron	Candidastrum			R. albiflorum	33674177	70037	1431	48996	42066
222	HR50_Rhirs_EU	Rhododendron	Rhododendron	Rhododendron	Rhododendron	R. hirsutum	46614818	76873	1378	46942	38741
223	HR56_Rpoly_EU	Rhododendron	Rhododendron	Vireya	Vireya	R. polyanthemum	38728038	61051	1544	43625	35388
224	HR57_Rcomm_EU	Rhododendron	Rhododendron	Vireya	Vireya	R. commonae	27281616	62079	1209	45017	39218
225	HR59_Rrube_EU	Rhododendron	Rhododendron	Vireya	Phaeovireya	R. rubellum	38090653	61043	1418	43592	36988
226	HR60_Rmacg_EU	Rhododendron	Rhododendron	Vireya	Vireya	R. macgregoriae	37414828	89557	1365	62656	47729
227	HR61_Reric_EU	Rhododendron	Rhododendron	Vireya	Pseudovireya	R. ericoides	28297160	70433	1136	53426	45454
228	HR62_Rreti_EU	Rhododendron	Rhododendron	Vireya	Vireya	R. retivenium	32582715	73083	1245	55448	48272
229	HR63_Rdela_XZ	Rhododendron	Hymenanthes	Ponticum	Arborea	R. delavayi	31455512	72004	1291	49648	41651
230	HR64_Rward_XZ	Rhododendron	Hymenanthes	Ponticum	Campylocarpa	R. wardii	28010448	78586	1364	49588	40003
231	HR65_Rpont_EU	Rhododendron	Hymenanthes	Ponticum	Pontica	R. ponticum	39294614	102212	1081	73219	54883
232	HR66_Rocci_EU	Rhododendron	Pentanthera	Pentanthera		R. occidentale	41832244	61625	1443	38950	33785
233	HR67_Rcana_EU	Rhododendron	Pentanthera	Rhodora		R. canadense	29091878	58878	1167	41035	37005
234	HR68_Rnipp_Ja	Rhododendron	Pentanthera	Viscidula		R. nipponicum	10975232	24376	613	19054	12719
235	HR70_Rquin_Ja	Rhododendron	Pentanthera	Sciadorhodion		R. quinquefolium	23473854	45096	897	32586	26891
236	HR72_semi_Ja	Rhododendron	Mumeazalea			R. semibarbatum	23297948	94971	769	76730	48452
237	HR73_tsoi_ls	Rhododendron	Tsutsusi	Tsutsusi		R. tsoi	23669562	240219	751	240206	172140
238	HR74_dila_ls	Rhododendron	Tsutsusi	Brachycalyx		R. dilatatum_	23412154	71652	1398	55539	34782
239	01s_R_moupHXY01	Rhododendron	Rhododendron	Rhododendron	Moupinensia	R. moupinense	41106676	177086	1144	114476	86123
240	05s_R_luteHXY01	Rhododendron	Rhododendron	Rhododendron	Triflora	R. lutescens_	40039395	143901	1353	81255	63900
241	07s_R_hunnHXY01	Rhododendron	Hymenanthes	Ponticum	Argyrophylla	R. hunnewellianum_	30522133	148085	1263	81255	59185
242	08s_R_mekoHXY01	Rhododendron	Rhododendron	Rhododendron	Trichoclada	R. mekongense_	35660279	187986	1127	110972	74820
243	10s_R_raceHXY01	Rhododendron	Rhododendron	Rhododendron	Scabrifolia	R. racemosum	21009764	143313	1057	83410	60304
244	11s_R_redoHXY01	Rhododendron	Therorhodion	Therorhodion	Therorhodion	R. redowskianum	29175812	132598	1371	68427	49667
245	17s_R_semnHXY01	Rhododendron	Hymenanthes	Ponticum	Falconera	R. semnoides_	23373217	115279	1245	65403	54174
246	19s_R_granHXY01	Rhododendron	Hymenanthes	Ponticum	Grandia	R. grande_	27818992	143839	1347	78386	59528
247	21s_R_stamHXY01	Rhododendron	Azaleastrum	Choniastrum	Choniastrum	R. stamineum_	16744543	123694	1136	72013	58408
248	23s_R_pendHXY01	Rhododendron	Rhododendron	Rhododendron	Edgeworthia	R. pendulum_	30219622	178860	1302	88483	62936
249	29s_D_multHXY01	Diplarche				Diplarche multiflora	26671196	121907	1317	66509	55875
250	30s_L_paluHXY01	Ledum				R. tomentosum_	20003714	93195	1133	56465	47748
Information of chloroplast genomes sequenced in this study
No.	Sampling No.	Genus	Subgenus	Section	Subsection	Species	Length	GC	Depth
251	cham	Rhododendron	Azaleastrum	Choniastrum	Choniastrum	R. championiae	160336 bp	0.3555	1097.5
252	tome	Rhododendron	Rhododendron	Rhododendron	Ledum	R. tomentosum	167119 bp	0.3554	268.9
253	mucr	Rhododendron	Rhododendron	Rhododendron	Rhododorastra	R. mucronulatum	180508 bp	0.3539	516.3
254	aust	Rhododendron	Pentanthera	Pentanthera	Pentanthera	R. austrinum	183522 bp	0.3619	949.2
255	jing	Rhododendron	Hymenanthes	Ponticum	Fortunea	R. jingangshanicum	178048 bp	0.3632	117.9
256	hunn	Rhododendron	Hymenanthes	Ponticum	Argyrophylla	R. hunnewellianum	176663 bp	0.3551	221.5
