# Supplementary material for: Spatiotemporal evolution of the global species diversity of Rhododendron
Source: Research Square preprint supplement (doi:10.21203/rs.3.rs-125967/v1), 2020-12-29
Supplement: Supplementary file 2 [file a164deb3891deee609cd740a.xlsx]

## Sheet: Sheet1
Anagenetic dispersal (mean of all observed anagenetic 'a' or 'd' dispersals):							(A) Eastern North America (B) Western North America (C) South Asia (D) Europe (E) Malaysian Archipelago (F) North-East Asia
means:
	A	B	C	D	E	F
A	0	1.72	0.94	0.92	0.26	0
B	0.5	0	0.42	0.32	0.02	0
C	0.48	0.38	0	0.5	0.06	0
D	0.84	0.7	0.72	0	3.9	0
E	0.08	0.08	0.14	8.24	0	0.08
F	0	0	0	0	0.14	0
Cladogenetic dispersal (mean of all observed jump 'j' dispersals):
means:
	A	B	C	D	E	F
A	0	0.64	1	0.28	0.4	0
B	0.02	0	0	0.12	0.02	0
C	0.26	0	0	0.26	0.04	0
D	0.36	0.74	0.86	0	1.2	0
E	0.28	0.28	0.44	2.72	0	0.96
F	0	0	0	0	0.84	0
ALL dispersal (mean of all observed anagenetic 'a', 'd' dispersals, PLUS cladogenetic founder/jump dispersal):
means:
	A	B	C	D	E	F
A	0	2.36	1.94	1.2	0.66	0
B	0.52	0	0.42	0.44	0.04	0
C	0.74	0.38	0	0.76	0.1	0
D	1.2	1.44	1.58	0	5.1	0
E	0.36	0.36	0.58	10.96	0	1.04
F	0	0	0	0	0.98	0
Summary of event counts from 50 BSMs:
	founder	a	d	e	subset	vicariance	sympatry	ALL_disp	ana_disp	all_ana	all_clado	total_events
means	11.72	0	21.44	0	14.2	5.1	168	33.16	21.44	21.44	199	220.4
stdevs	2.15	0	2.07	0	3.12	1.87	2.34	1.8	2.07	2.07	0	2.07
sums	586	0	1072	0	710	255	8399	1658	1072	1072	9950	11022

## Sheet: Sheet2
Anagenetic dispersal (mean of all observed anagenetic 'a' or 'd' dispersals):
means:							A, Eastern North America B, Western North America C, South Asia D, Europe E, Malaysian Archipelago F, North-East Asia
	A	B	C	D	E	F
A	0	1.72	0.94	0.92	0.26	0
B	0.5	0	0.42	0.32	0.02	0
C	0.48	0.38	0	0.5	0.06	0
D	0.84	0.7	0.72	0	3.9	0
E	0.08	0.08	0.14	8.24	0	0.08
F	0	0	0	0	0.14	0
Cladogenetic dispersal (mean of all observed jump 'j' dispersals):
means:
	A	B	C	D	E	F
A	0	0.64	1	0.28	0.4	0
B	0.02	0	0	0.12	0.02	0
C	0.26	0	0	0.26	0.04	0
D	0.36	0.74	0.86	0	1.2	0
E	0.28	0.28	0.44	2.72	0	0.96
F	0	0	0	0	0.84	0
All dispersal (mean of all observed anagenetic 'a', 'd' dispersals, plus cladogenetic founder/jump dispersal):
means:
	A	B	C	D	E	F
A	0	2.36	1.94	1.2	0.66	0
B	0.52	0	0.42	0.44	0.04	0
C	0.74	0.38	0	0.76	0.1	0
D	1.2	1.44	1.58	0	5.1	0
E	0.36	0.36	0.58	10.96	0	1.04
F	0	0	0	0	0.98	0
Summary of event counts from 50 BSMs:
	founder	a	d	e	subset	vicariance	sympatry	ALL_disp	ana_disp	all_ana	all_clado	total_events
means	11.72	0	21.44	0	14.2	5.1	168	33.16	21.44	21.44	199	220.4
stdevs	2.15	0	2.07	0	3.12	1.87	2.34	1.8	2.07	2.07	0	2.07
sums	586	0	1072	0	710	255	8399	1658	1072	1072	9950	11022
